# Supplementary material for: Canonical goal-selective representations are absent from prefrontal cortex in a spatial working memory task requiring behavioral flexibility
Source: eLife journal article supplement (doi:10.7554/elife.63035), 2020-12-24
Supplement: supp [file elife-63035-supp-v1.zip]

Archive with 11 entries (11 files):
- elife_poa_e63035_Video_1.mp4
- elife_poa_e63035_Transparent_Reporting_File.docx
- elife_poa_e63035_Figure_2_figure_supplement_1.pdf
- elife_poa_e63035_Figure_2_figure_supplement_2.pdf
- elife_poa_e63035_Figure_3_figure_supplement_1.pdf
- elife_poa_e63035_Figure_3_figure_supplement_2.pdf
- elife_poa_e63035_Figure_3_figure_supplement_3.pdf
- elife_poa_e63035_Figure_3_figure_supplement_4.pdf
- elife_poa_e63035_Figure_5_figure_supplement_1.pdf
- elife_poa_e63035_Figure_5_figure_supplement_2.pdf
- elife_poa_e63035_Figure_6_figure_supplement_1.pdf
