# Supplementary material for: Canonical goal-selective representations are absent from prefrontal cortex in a spatial working memory task requiring behavioral flexibility
Source: eLife journal article supplement (doi:10.7554/elife.63035), 2020-12-24

# Figure 2 - figure supplement 1

## A

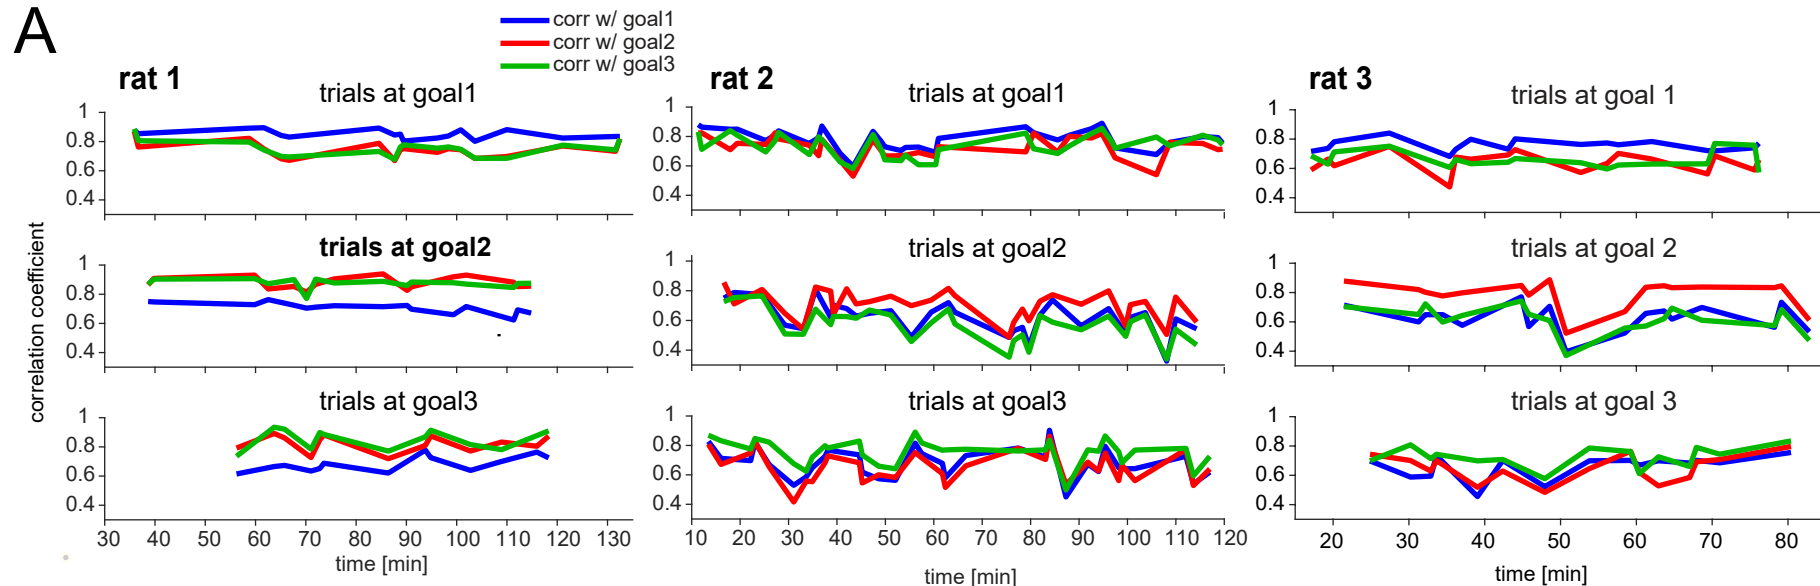

## B

goal representation at goals in sample phase and in test phase

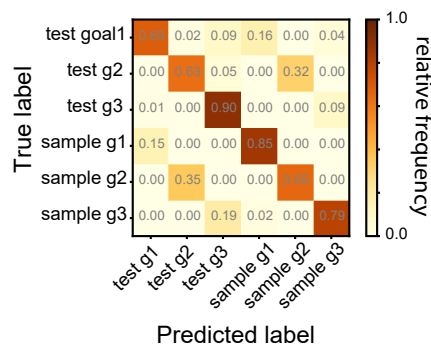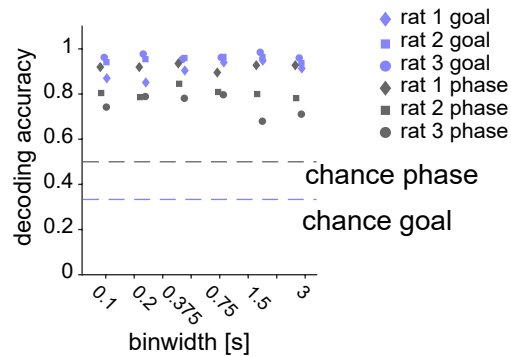

cross-phase decoding of goal

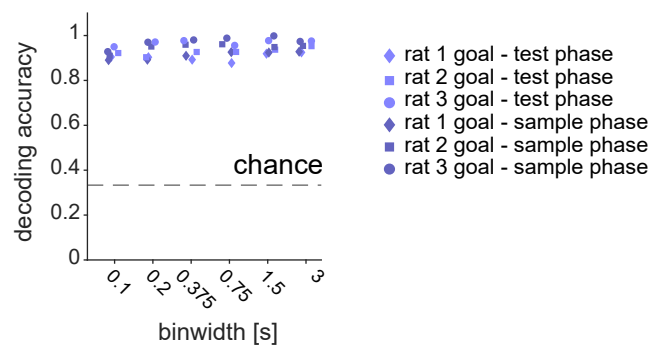

Supplement: supp [file elife-63035-supp-v1.zip › elife_poa_e63035_Figure_2_figure_supplement_1.pdf]
