# Supplementary material for: Canonical goal-selective representations are absent from prefrontal cortex in a spatial working memory task requiring behavioral flexibility
Source: eLife journal article supplement (doi:10.7554/elife.63035), 2020-12-24

# Figure 2 - figure supplement 2

cell counts (after selection for stability of firing rate throughout task performance):

## infralimbic

rat 1: 27

rat 2: 21

rat 3: 18

## prelimbic

rat 1: 41

rat 2: 51

rat 3: 37

## ACC

rat 1: 7

rat 2: 8

rat 3: 13

## DP

rat 1: 22

rat 2: 4

rat 3: -

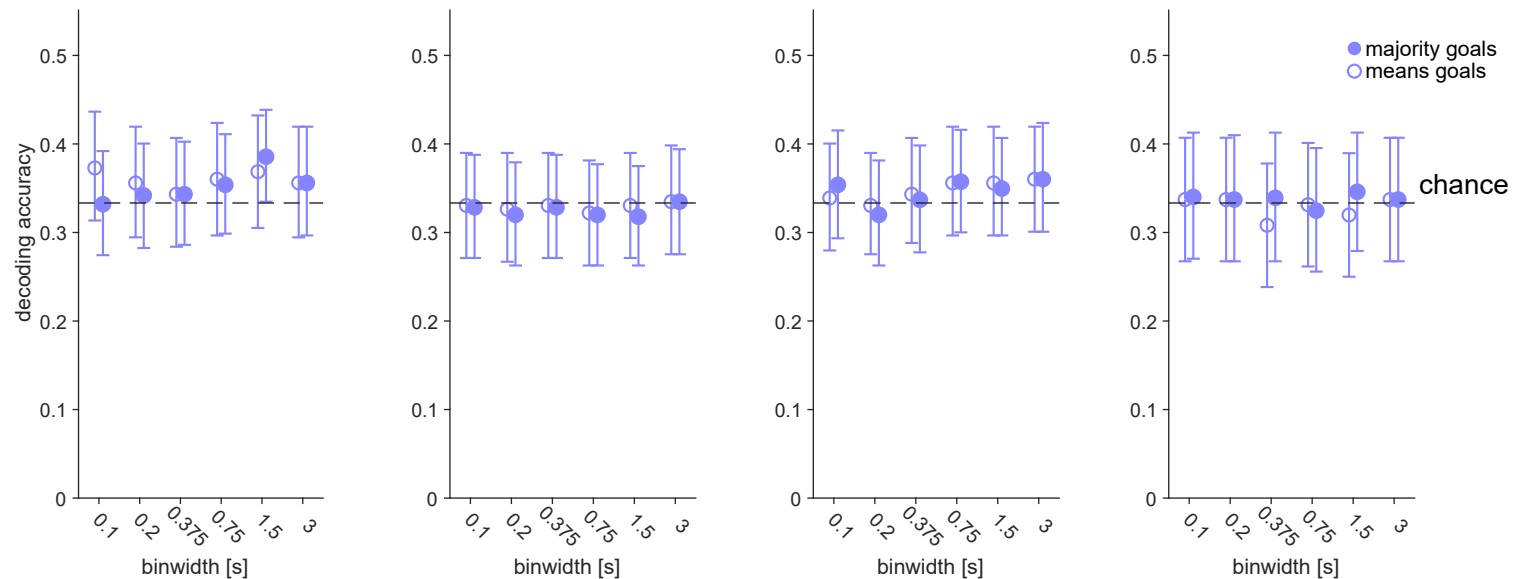

Supplement: supp [file elife-63035-supp-v1.zip › elife_poa_e63035_Figure_2_figure_supplement_2.pdf]
