# Supplementary figures and images for: Canonical goal-selective representations are absent from prefrontal cortex in a spatial working memory task requiring behavioral flexibility
Source: eLife journal article supplement (doi:10.7554/elife.63035), 2020-12-24

# Figure 3 - figure supplement 1

## A

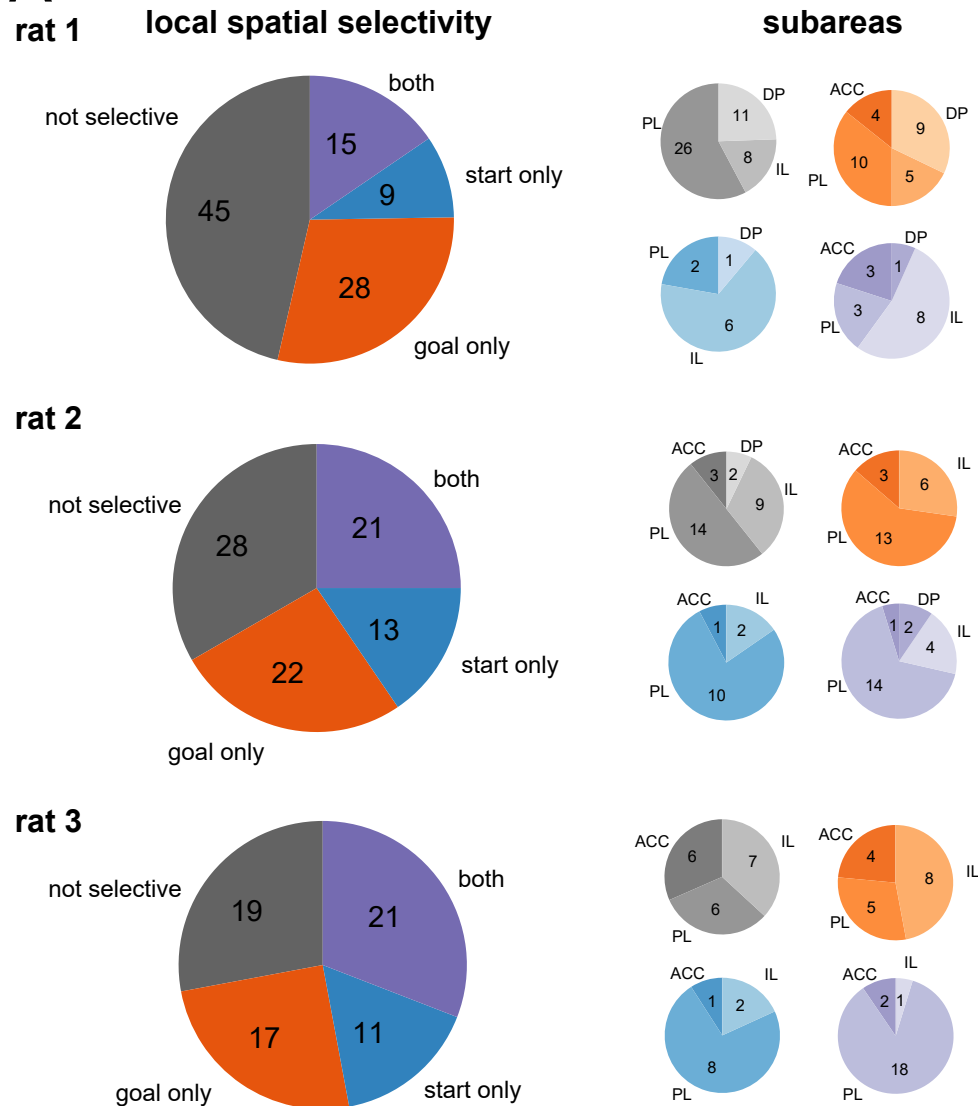

## B

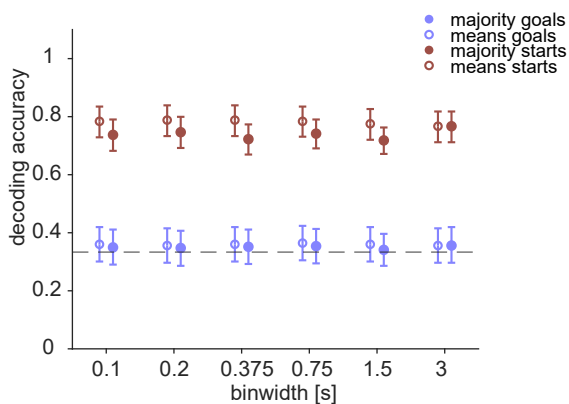

Supplement: supp [file elife-63035-supp-v1.zip › elife_poa_e63035_Figure_3_figure_supplement_1.pdf]

# Figure 3 - figure supplement 2

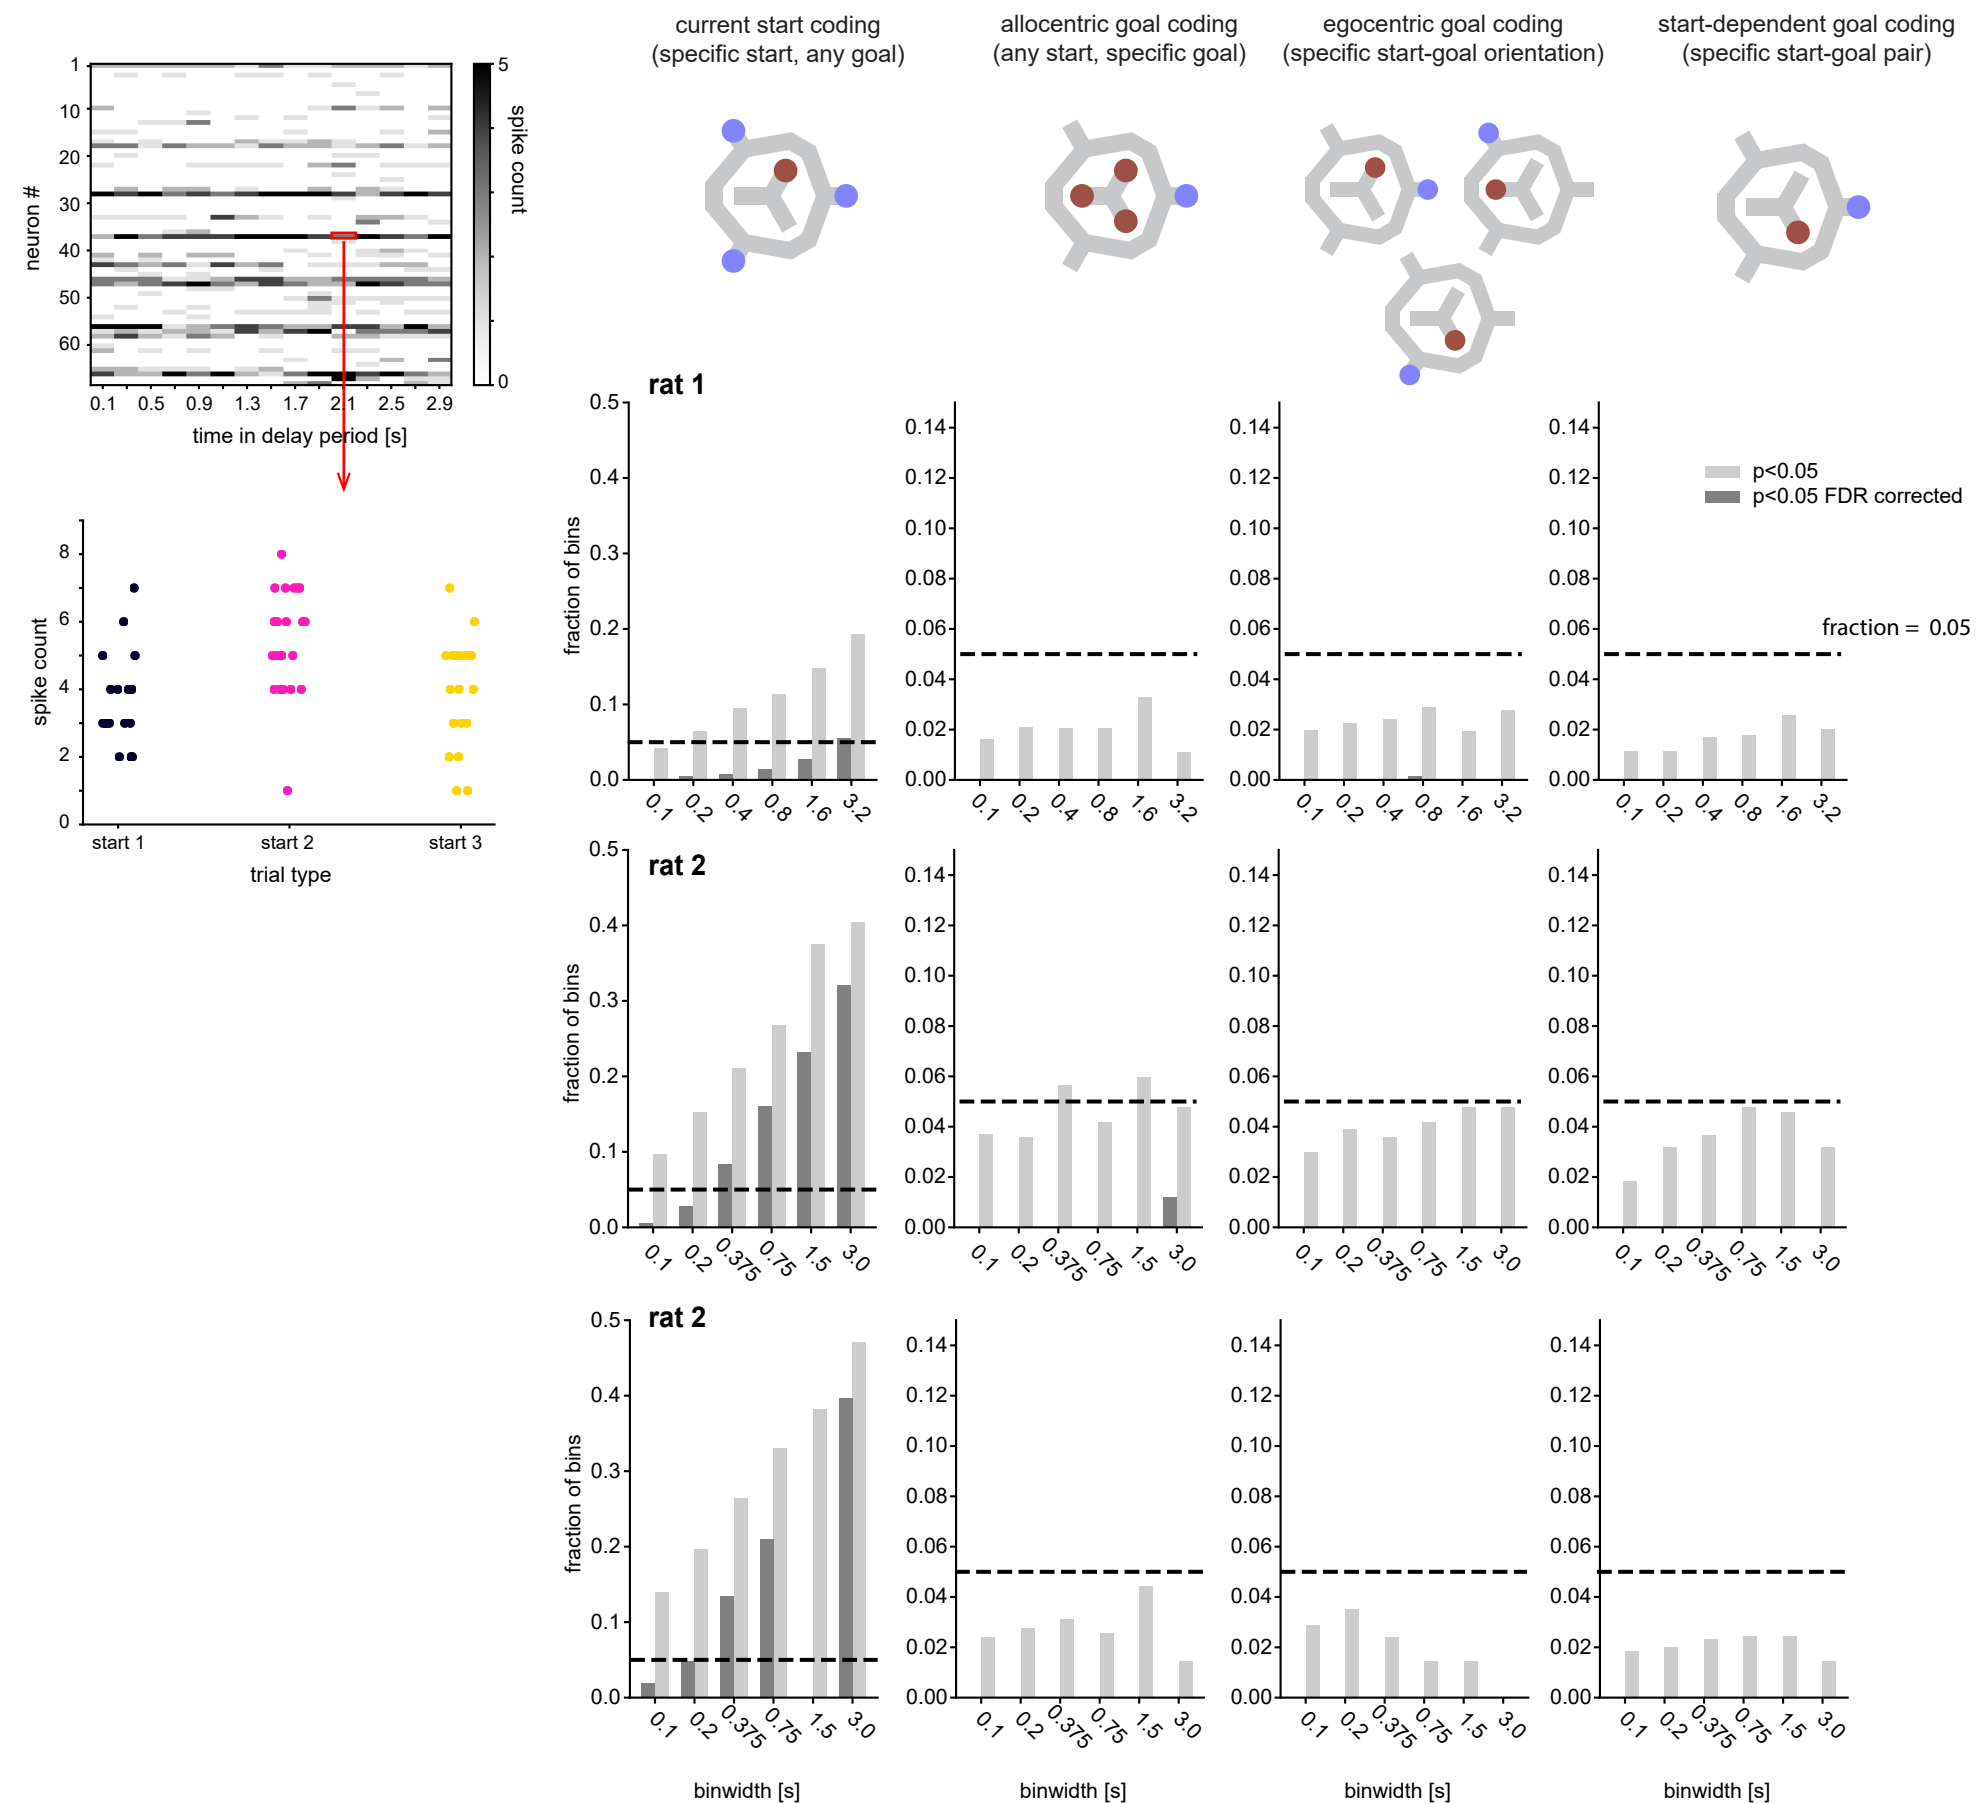

Supplement: supp [file elife-63035-supp-v1.zip › elife_poa_e63035_Figure_3_figure_supplement_2.pdf]

# Figure 3 - figure supplement 3

cell counts (all cells including interneurons):

rat 1: 182

rat 2: 131

rat 3: 98

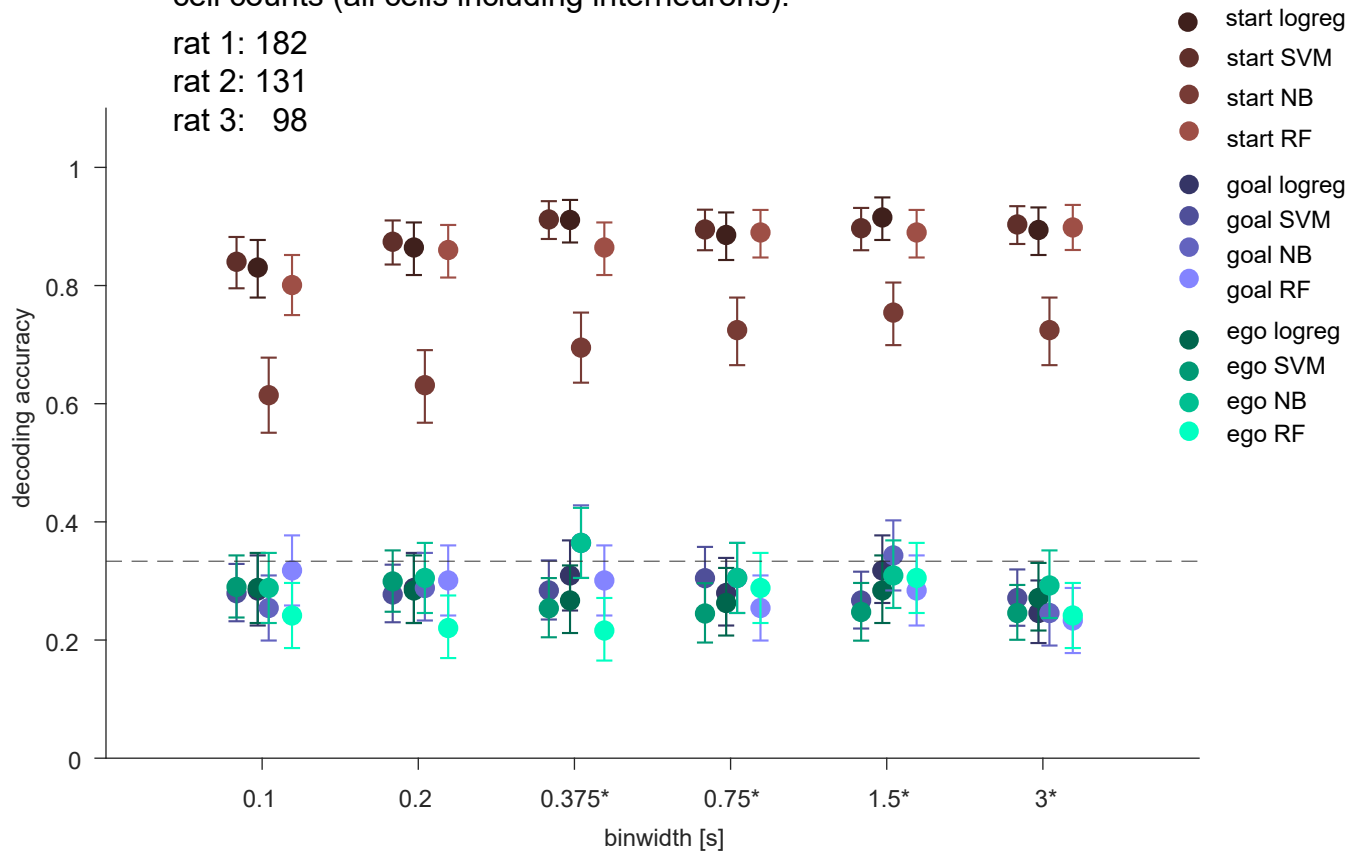

Supplement: supp [file elife-63035-supp-v1.zip › elife_poa_e63035_Figure_3_figure_supplement_3.pdf]

# Figure 3 - figure supplement 4

neural data

position data

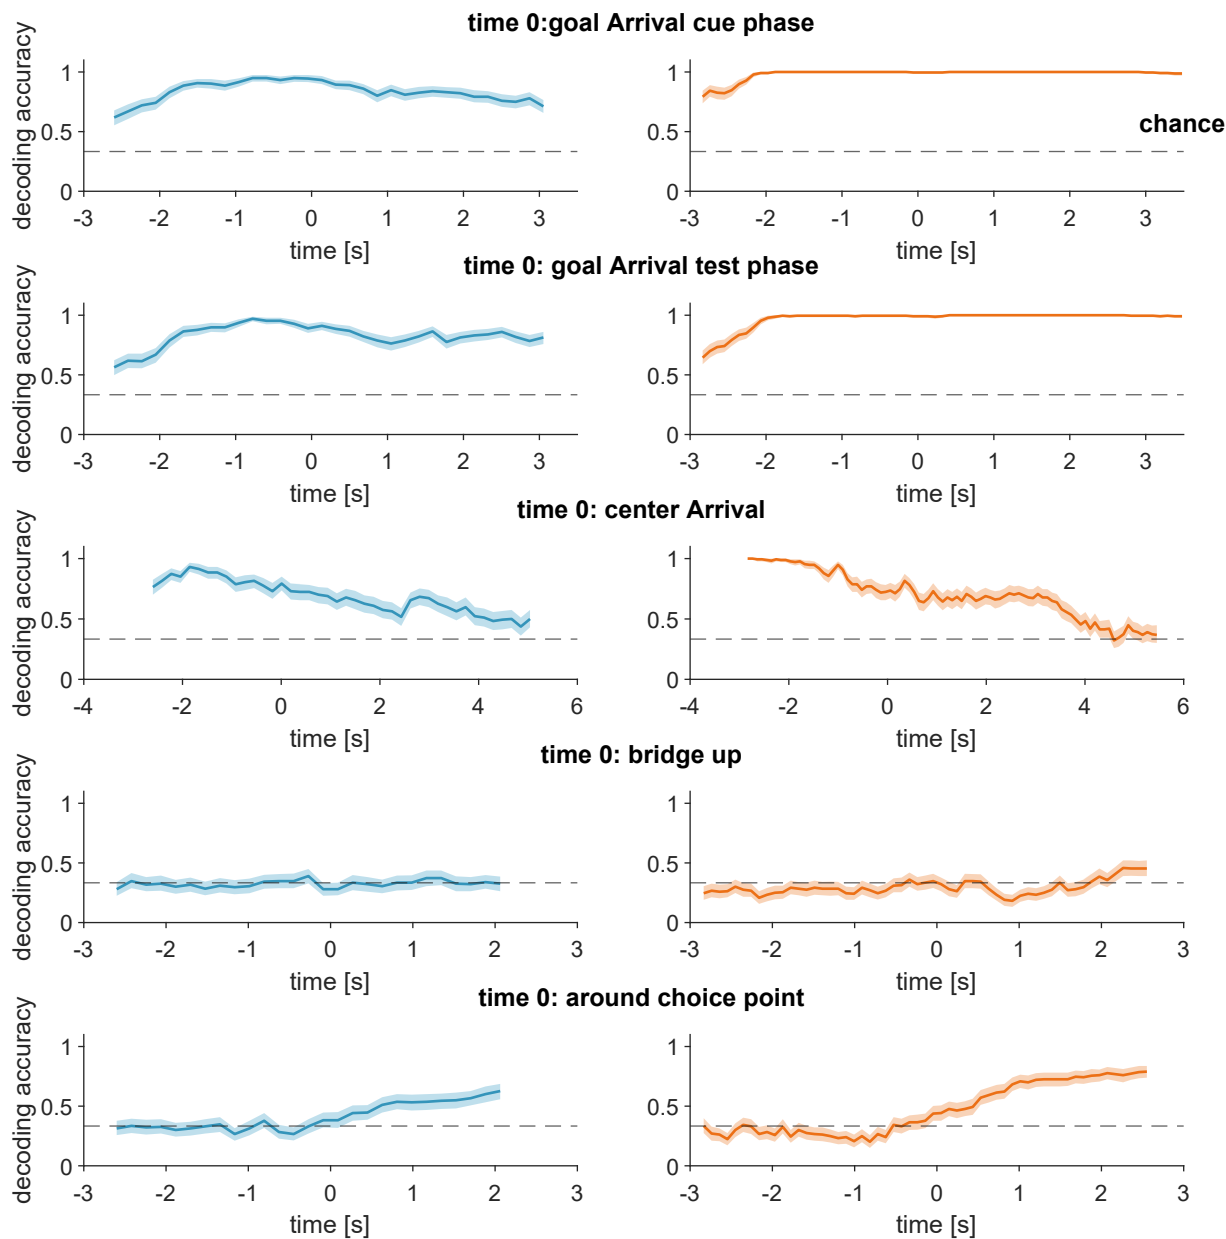

Supplement: supp [file elife-63035-supp-v1.zip › elife_poa_e63035_Figure_3_figure_supplement_4.pdf]

# Figure 5 - figure supplement 2

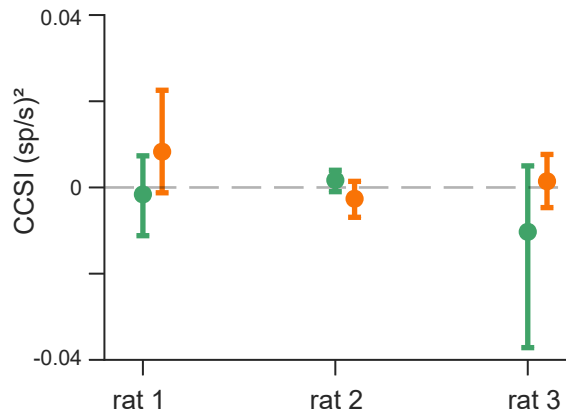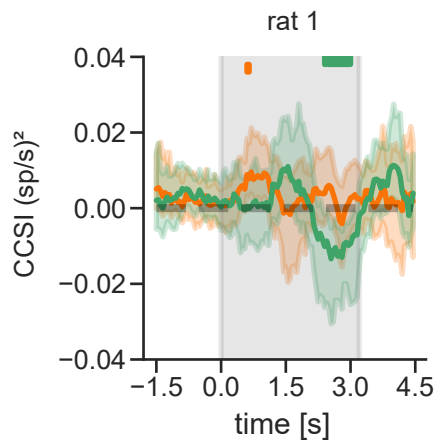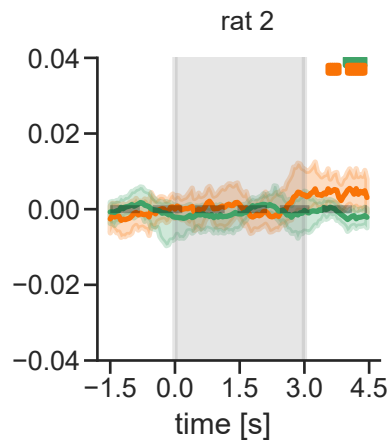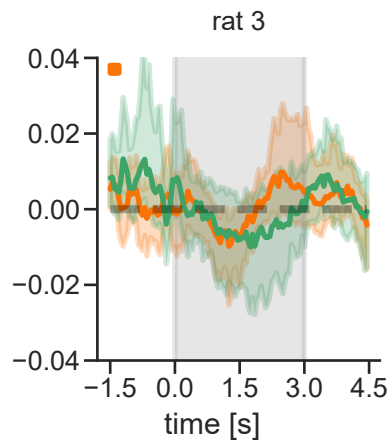

Supplement: supp [file elife-63035-supp-v1.zip › elife_poa_e63035_Figure_5_figure_supplement_2.pdf]

# Figure 6 - figure supplement 1

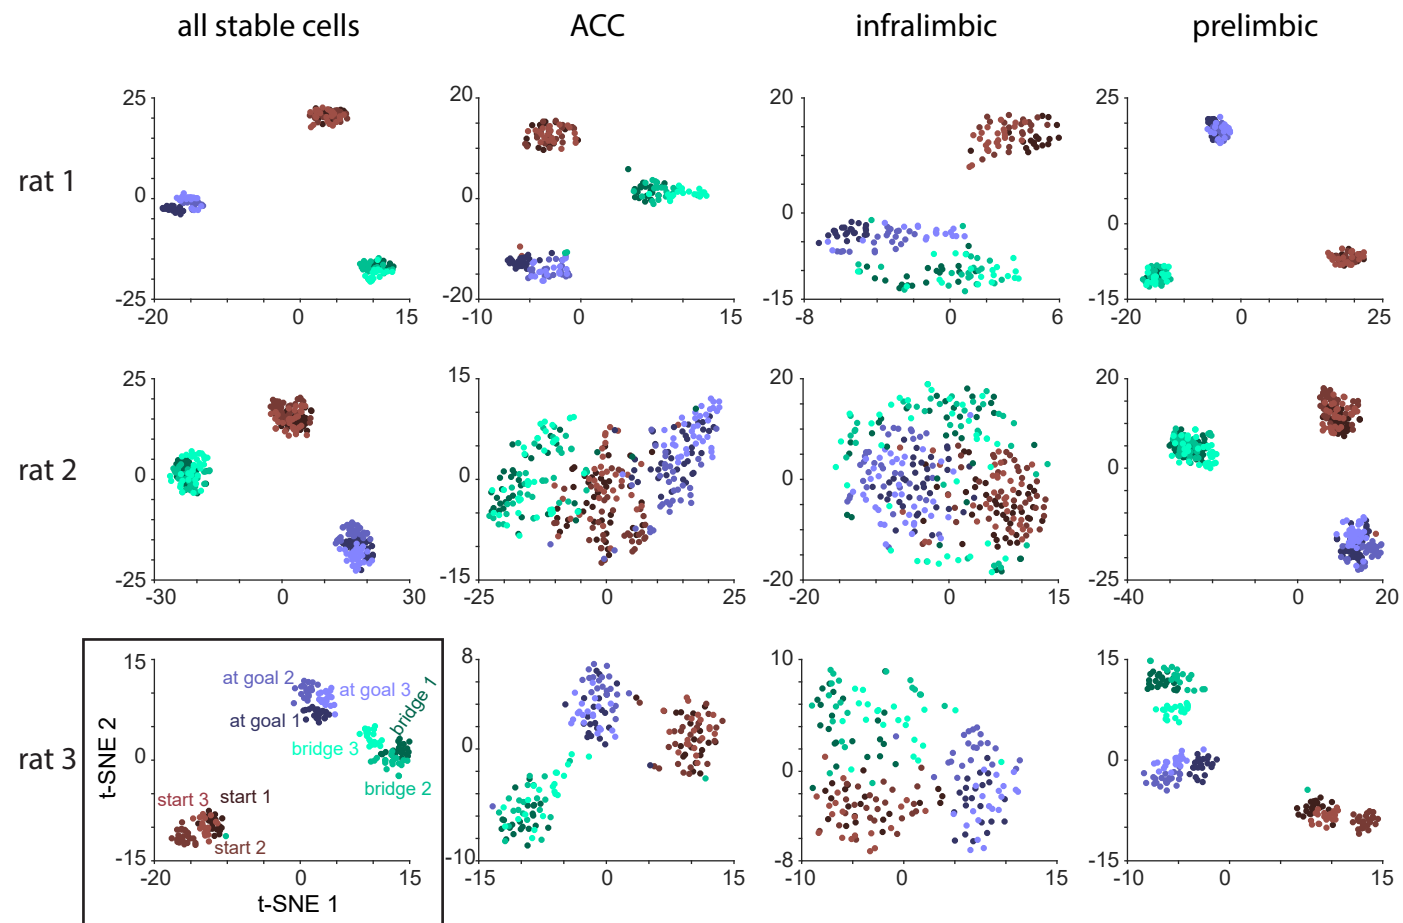

Supplement: supp [file elife-63035-supp-v1.zip › elife_poa_e63035_Figure_6_figure_supplement_1.pdf]
